# Supplementary material for: Application of flexible bis-pyrazine–bis-amide ligands to construct various polyoxometalate-based metal–organic complexes
Source: Royal Society of Chemistry journal article supplement (doi:10.1039/c5ra09529h), 2015-01-01
Supplement: c5ra09529h1.pdf [file c5ra09529h1.pdf]

Supplementary Material (ESI) for RSC Advances

This journal is © The Royal Society of Chemistry

**Application of flexible bis-pyrazine-bis-amide ligands to  
construct various polyoxometalate-based metal–organic  
complexes**

Xiu-Li Wang\* Dan-Na Liu, Hong-Yan Lin, Guo-Cheng Liu, Na Han, Jian Luan and  
Zhi-Han Chang

*Department of Chemistry, Bohai University, Liaoning Province Silicon Materials*

*Engineering Technology Research Centre, Jinzhou 121000, P. R. China*

**Table S1** Selected bond distances (Å) and angles (°) for compounds **1–5**.

|                                                                                      |           |                      |            |
|--------------------------------------------------------------------------------------|-----------|----------------------|------------|
| <b>Compound 1</b>                                                                    |           |                      |            |
| Cu(1)-O(2)                                                                           | 1.923(5)  | O(3)-Cu(1)-N(1)      | 82.7(2)    |
| Cu(1)-O(3)                                                                           | 1.931(5)  | O(1W)-Cu(1)-N(1)     | 165.7(3)   |
| Cu(1)-O(1W)                                                                          | 1.939(7)  | O(2)-Cu(1)-O(1)      | 88.4(2)    |
| Cu(1)-N(1)                                                                           | 1.977(6)  | O(3)-Cu(1)-O(1)      | 95.7(2)    |
| Cu(1)-O(1)                                                                           | 2.404(6)  | O(1W)-Cu(1)-O(1)     | 100.0(3)   |
| Cu(2)-N(3)                                                                           | 1.961(6)  | N(1)-Cu(1)-O(1)      | 91.5(2)    |
| Cu(2)-N(3)#1                                                                         | 1.961(6)  | N(3)-Cu(2)-N(3)#1    | 179.998(1) |
| Cu(2)-O(4)#1                                                                         | 1.970(5)  | N(3)-Cu(2)-O(4)#1    | 97.40(2)   |
| Cu(2)-O(4)                                                                           | 1.970(5)  | N(3)#1-Cu(2)-O(4)#1  | 82.60(2)   |
| O(2)-Cu(1)-O(3)                                                                      | 175.5(2)  | N(3)-Cu(2)-O(4)      | 82.60(2)   |
| O(2)-Cu(1)-O(1W)                                                                     | 93.70(3)  | N(3)#1-Cu(2)-O(4)    | 97.40(2)   |
| O(3)-Cu(1)-O(1W)                                                                     | 87.60(3)  | O(4)#1-Cu(2)-O(4)    | 179.999(2) |
| O(2)-Cu(1)-N(1)                                                                      | 95.2(2)   |                      |            |
| Symmetry code for <b>1</b> : #1 $-x-1, -y+2, -z+2$                                   |           |                      |            |
| <b>Compound 2</b>                                                                    |           |                      |            |
| Cu(1)-O(1)                                                                           | 1.962(2)  | O(3)#1-Cu(1)-N(1)    | 93.06(10)  |
| Cu(1)-O(3)#1                                                                         | 1.963(2)  | O(1)-Cu(1)-N(5)#1    | 101.66(10) |
| Cu(1)-N(1)                                                                           | 1.969(2)  | O(3)#1-Cu(1)-N(5)#1  | 82.63(10)  |
| Cu(1)-N(5)#1                                                                         | 1.971(3)  | N(1)-Cu(1)-N(5)#1    | 175.21(10) |
| Cu(1)-O(2)                                                                           | 2.322(2)  | O(1)-Cu(1)-O(2)      | 85.22(9)   |
| O(3)-Cu(1)#3                                                                         | 1.963(2)  | O(3)#1-Cu(1)-O(2)    | 95.26(9)   |
| N(5)-Cu(1)#3                                                                         | 1.971(3)  | N(1)-Cu(1)-O(2)      | 87.41(9)   |
| O(1)-Cu(1)-O(3)#1                                                                    | 175.64(9) | N(5)#1-Cu(1)-O(2)    | 95.04(9)   |
| O(1)-Cu(1)-N(1)                                                                      | 82.63(10) |                      |            |
| Symmetry code for <b>2</b> : #1 $-x-1/2, y+1/2, -z+1/2$ ; #3 $-x-1/2, y-1/2, -z+1/2$ |           |                      |            |
| <b>Compound 3</b>                                                                    |           |                      |            |
| Cu(1)-O(1)#2                                                                         | 1.947(7)  | O(1)#2-Cu(1)-O(1W)#2 | 94.2(3)    |

\* Corresponding author. Tel.: +86-416-3400158

E-mail address: [wangxiuli@bhu.edu.cn](mailto:wangxiuli@bhu.edu.cn) (X.-L. Wang)

**Supplementary Material (ESI) for RSC Advances**

This journal is © The Royal Society of Chemistry

---

|                     |            |                      |            |
|---------------------|------------|----------------------|------------|
| Cu(1)-O(1)          | 1.948(7)   | O(1)-Cu(1)-O(1W)#2   | 85.8(3)    |
| Cu(1)-N(3)#2        | 1.957(7)   | N(3)#2-Cu(1)-O(1W)#2 | 81.1(3)    |
| Cu(1)-N(3)          | 1.957(7)   | N(3)-Cu(1)-O(1W)#2   | 98.9(3)    |
| Cu(1)-O(1W)#2       | 2.405(11)  | O(1)#2-Cu(1)-O(1W)   | 85.8(3)    |
| Cu(1)-O(1W)         | 2.405(11)  | O(1)-Cu(1)-O(1W)     | 94.2(3)    |
| N(1)-Cu(2)          | 2.002(13)  | N(3)#2-Cu(1)-O(1W)   | 98.9(3)    |
| Cu(2)-O(2)          | 1.950(9)   | N(3)-Cu(1)-O(1W)     | 81.1(3)    |
| Cu(2)-O(2)#3        | 1.950(9)   | O(1W)#2-Cu(1)-O(1W)  | 180.0      |
| Cu(2)-N(1)#3        | 2.002(13)  | O(2)-Cu(2)-O(2)#3    | 179.999(1) |
| O(1)#2-Cu(1)-O(1)   | 180.0(4)   | O(2)-Cu(2)-N(1)#3    | 96.8(4)    |
| O(1)#2-Cu(1)-N(3)#2 | 97.0(3)    | O(2)#3-Cu(2)-N(1)#3  | 83.2(4)    |
| O(1)-Cu(1)-N(3)#2   | 83.0(3)    | O(2)-Cu(2)-N(1)      | 83.2(4)    |
| O(1)#2-Cu(1)-N(3)   | 83.0(3)    | O(2)#3-Cu(2)-N(1)    | 96.8(4)    |
| O(1)-Cu(1)-N(3)     | 97.0(3)    | N(1)#3-Cu(2)-N(1)    | 179.999(1) |
| N(3)#2-Cu(1)-N(3)   | 180.000(1) |                      |            |

Symmetry code for **3**: #2 -x-1, -y+1, -z -1 ; #3 -x, -y, -z**Compound 4**

|                     |            |                        |            |
|---------------------|------------|------------------------|------------|
| Cu(1)-O(1)#2        | 1.969(11)  | O(2)-Cu(2)-N(5)        | 82.8(4)    |
| Cu(1)-O(1)          | 1.969(11)  | O(2)#3-Cu(2)-N(5)      | 97.2(4)    |
| Cu(1)-N(1)#2        | 2.011(16)  | O(2)-Cu(2)-N(5)#3      | 97.2(4)    |
| Cu(1)-N(1)          | 2.011(16)  | O(2)#3-Cu(2)-N(5)#3    | 82.8(4)    |
| Cu(2)-O(2)          | 1.950(8)   | N(5)-Cu(2)-N(5)#3      | 179.998(1) |
| Cu(2)-O(2)#3        | 1.950(8)   | O(2)#3-Cu(2)-N(5)#3    | 82.8(4)    |
| Cu(2)-N(5)          | 1.973(9)   | N(5)-Cu(2)-N(5)#3      | 179.998(1) |
| Cu(2)-N(5)#3        | 1.973(9)   | N(5)-Cu(2)-O(1W)       | 100.72(3)  |
| Cu(2)- O(1W)        | 2.446(10)  | N(5)#3-Cu(2)- O(1W)    | 79.28(3)   |
| Cu(2)- O(1W)#3      | 2.446(10)  | N(5)-Cu(2)-O(1W)#3     | 79.28(3)   |
| O(1)#2-Cu(1)-O(1)   | 179.998(1) | N(5)#3-Cu(2)-O(1W)#3   | 100.72(3)  |
| O(1)#2-Cu(1)-N(1)#2 | 82.7(5)    | O(2) -Cu(2)- O(1W)#3   | 86.73(3)   |
| O(1)-Cu(1)-N(1)#2   | 97.3(5)    | O(2)#3-Cu(2)- O(1W)    | 86.73(3)   |
| O(1)#2-Cu(1)-N(1)   | 97.3(5)    | O(1W)-Cu(2)- O(1W)#3   | 180.00(3)  |
| O(1)-Cu(1)-N(1)     | 82.7(5)    | O(2)-Cu(2)- O(1W)      | 93.27(3)   |
| N(1)#2-Cu(1)-N(1)   | 180.0(5)   | O(2)#3-Cu(2)- O(1W) #3 | 93.27(3)   |
| O(2)-Cu(2)-O(2)#3   | 180.0      |                        |            |

Symmetry code for **4**: #2 -x+1, -y+1, -z; #3 -x+2, -y, -z**Compound 5**

|              |           |                     |            |
|--------------|-----------|---------------------|------------|
| Cu(2)-O(1)   | 1.928(7)  | N(1)-Cu(1)-N(2)#2   | 91.6(4)    |
| Cu(1)-N(1)   | 1.990(10) | N(1)#2-Cu(1)-N(2)#2 | 88.4(4)    |
| Cu(1)-O(2)#2 | 1.963(8)  | O(2)#2-Cu(1)-N(2)   | 89.4(3)    |
| Cu(1)-O(2)   | 1.963(8)  | O(2)-Cu(1)-N(2)     | 90.6(3)    |
| Cu(1)-N(1)#2 | 1.990(10) | N(1)-Cu(1)-N(2)     | 88.4(4)    |
| Cu(1)-N(2)#2 | 2.430(9)  | N(1)#2-Cu(1)-N(2)   | 91.6(4)    |
| Cu(1)-N(2)   | 2.430(9)  | N(2)#2-Cu(1)-N(2)   | 179.999(1) |
| Cu(2)-O(1)#3 | 1.928(7)  | N(1)-Cu(1)-N(1)#2   | 179.999(1) |

**Supplementary Material (ESI) for RSC Advances**

This journal is © The Royal Society of Chemistry

|                     |            |                     |            |
|---------------------|------------|---------------------|------------|
| Cu(2)-N(4)          | 1.946(9)   | O(1)#3-Cu(2)-N(4)   | 96.6(3)    |
| Cu(2)-N(4)#3        | 1.946(9)   | O(1)-Cu(2)-N(4)     | 83.4(3)    |
| O(2)#2-Cu(1)-O(2)   | 179.999(1) | O(1)#3-Cu(2)-N(4)#3 | 83.4(3)    |
| O(2)#2-Cu(1)-N(1)   | 97.2(4)    | O(1)-Cu(2)-N(4)#3   | 96.6(3)    |
| O(2)-Cu(1)-N(1)     | 82.8(4)    | N(4)-Cu(2)-N(4)#3   | 179.999(2) |
| O(2)#2-Cu(1)-N(1)#2 | 82.8(4)    | O(1)#3-Cu(2)-O(1)   | 179.999(1) |

Symmetry code for **5** #2  $-x-1, -y, -z$ ; #3  $-x-2, -y-1, -z-1$

**Table S2.** Selected hydrogen-bonding geometry (Å, °) for compound **3** and **5**

|                   | D-H...A            | D-H  | H...A | D...A  | D-H...A |
|-------------------|--------------------|------|-------|--------|---------|
| Compound <b>3</b> | N(5)-H(5B)...O(22) | 0.86 | 2.23  | 3.0478 | 159     |
| Compound <b>5</b> | C(7)-H(7A)...O(10) | 0.93 | 2.45  | 3.3506 | 162     |

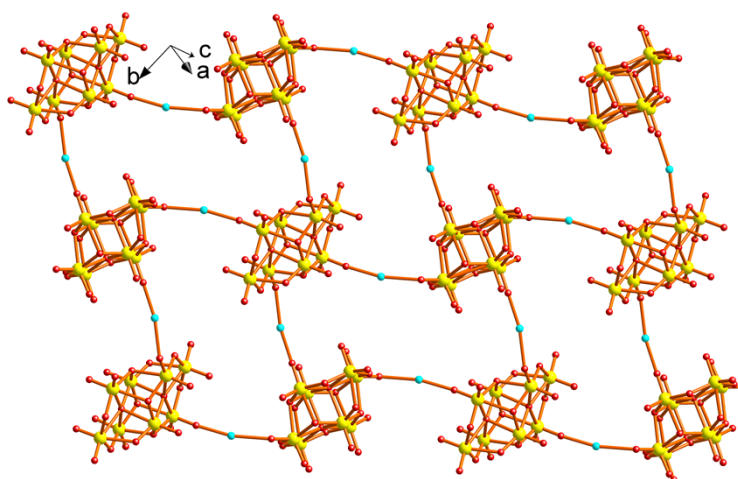

**Fig. S1** The 2D inorganic layer structure in **2** (The  $L^1$  ligands are omitted for clarity.).

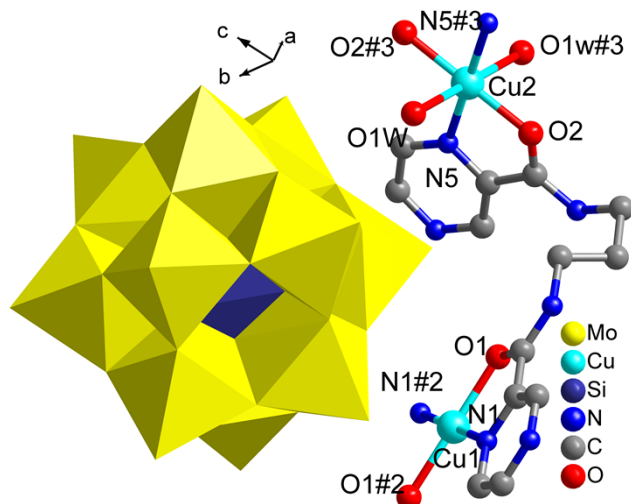

**Fig.S2** The coordination environment of the  $Cu^{II}$  ion in **4**. All H atoms and lattice water molecules are omitted for clarity. Symmetry codes: #2  $-x+1, -y+1, -z$ ; #3  $-x+2, -y, -z$ .

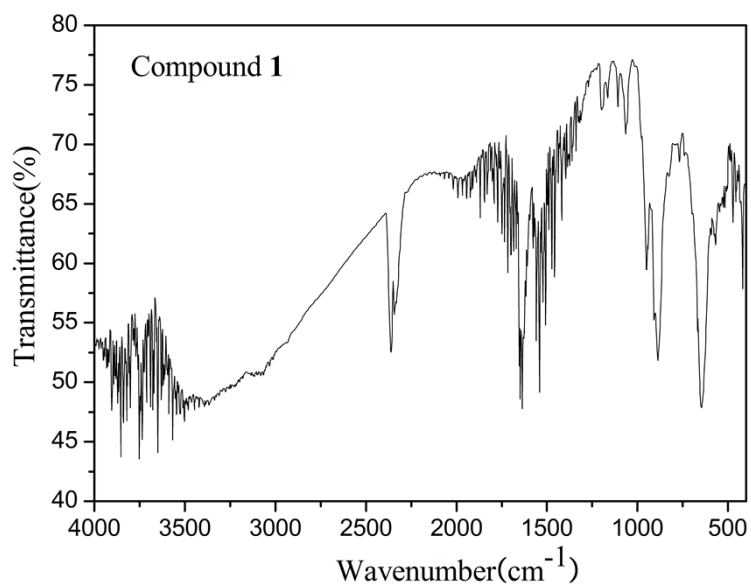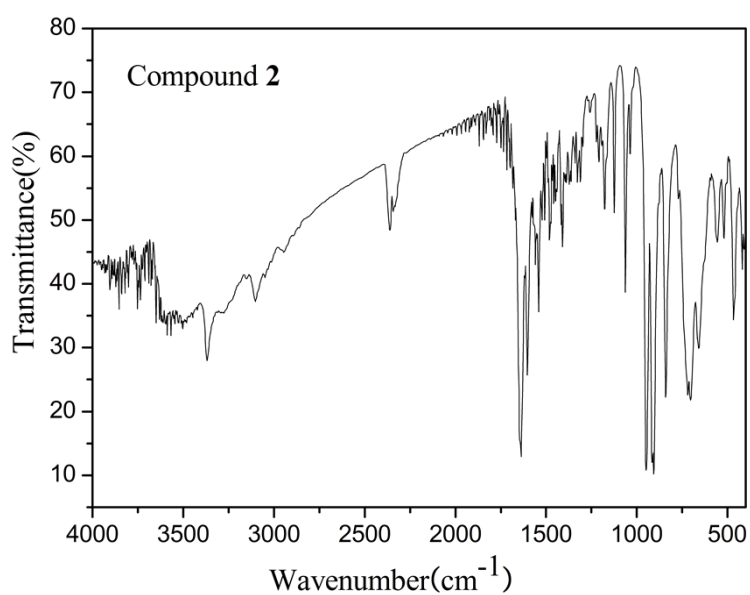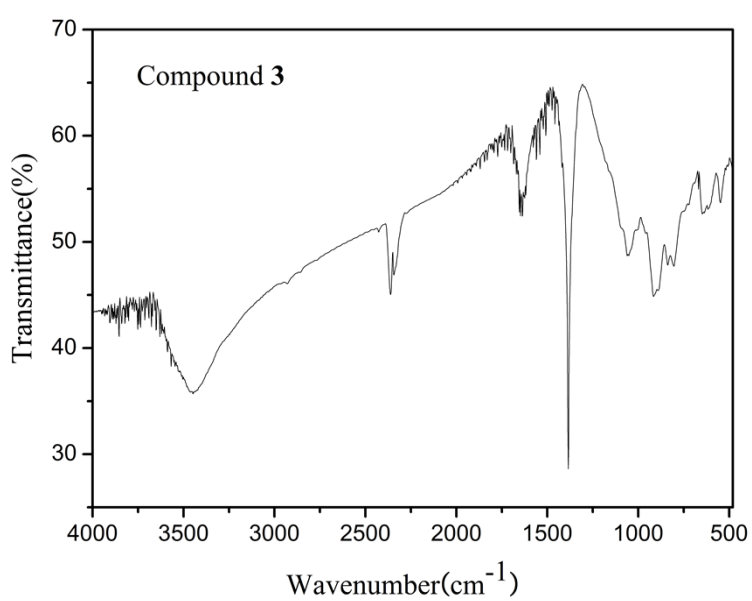

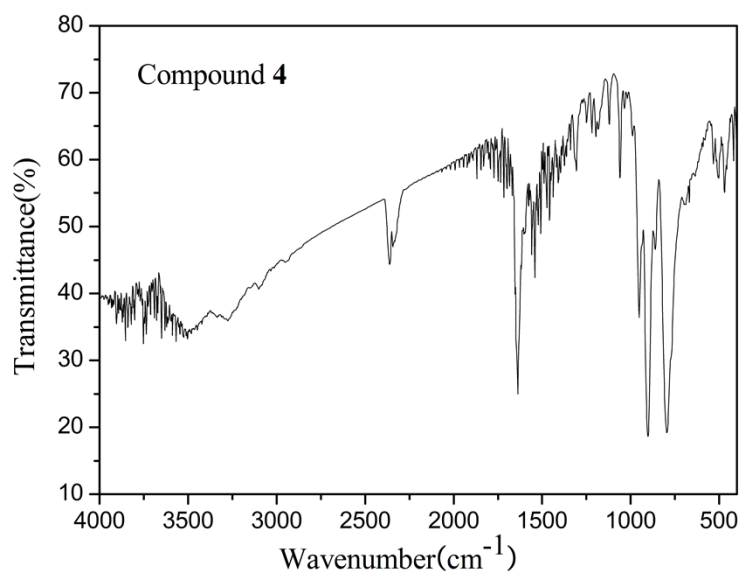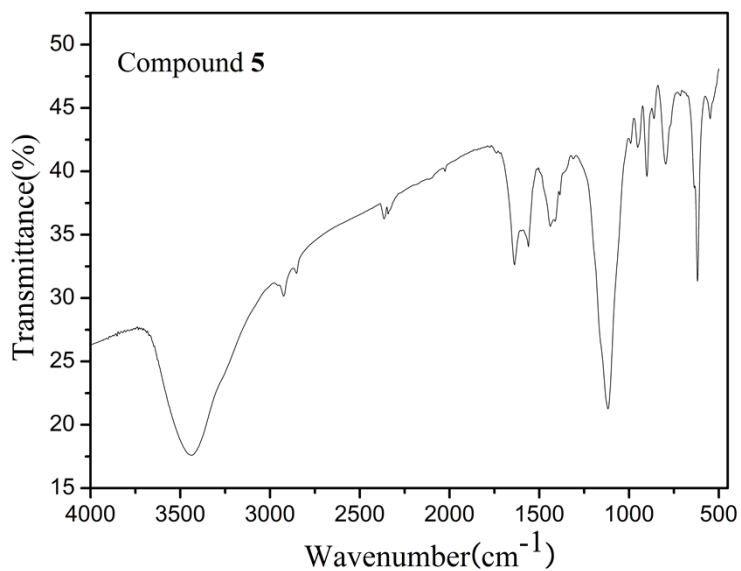

Fig. S3. The IR spectra of compounds 1-5.

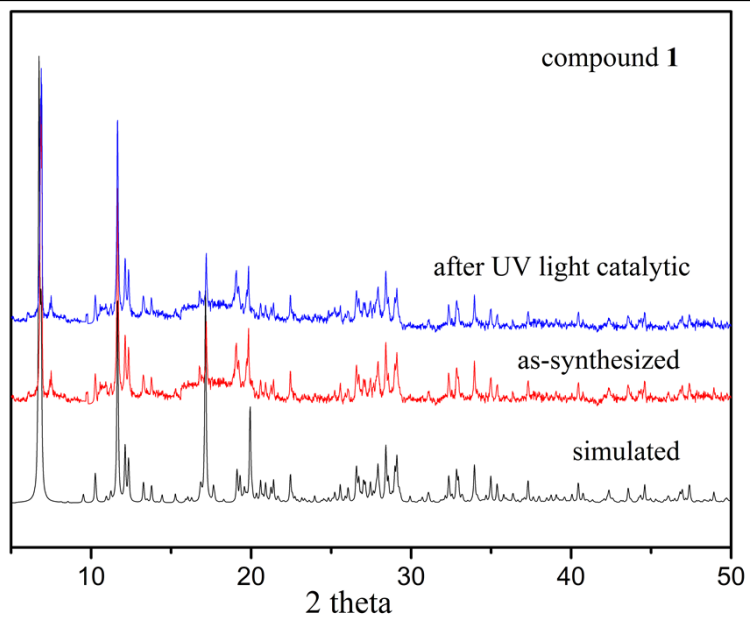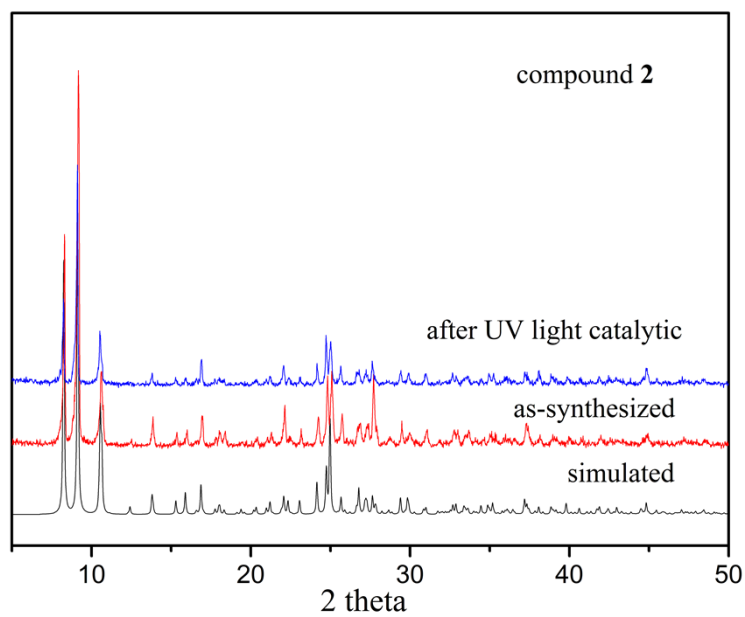

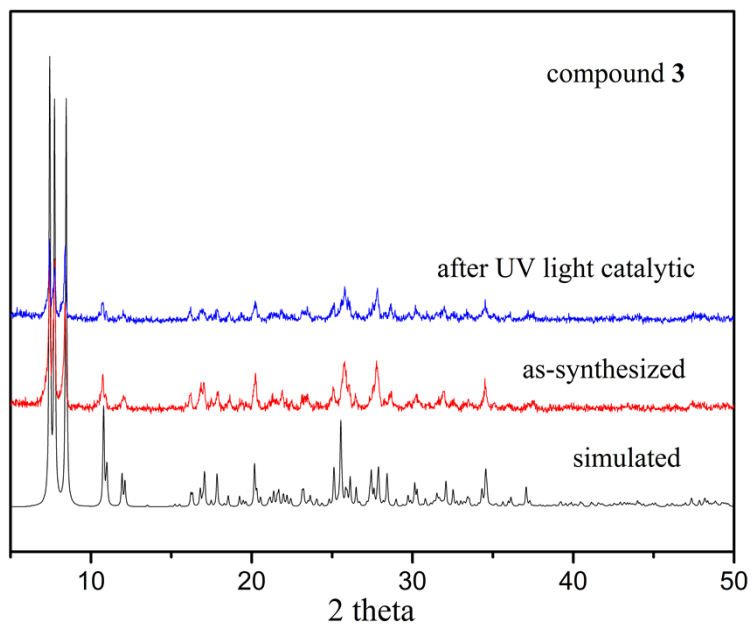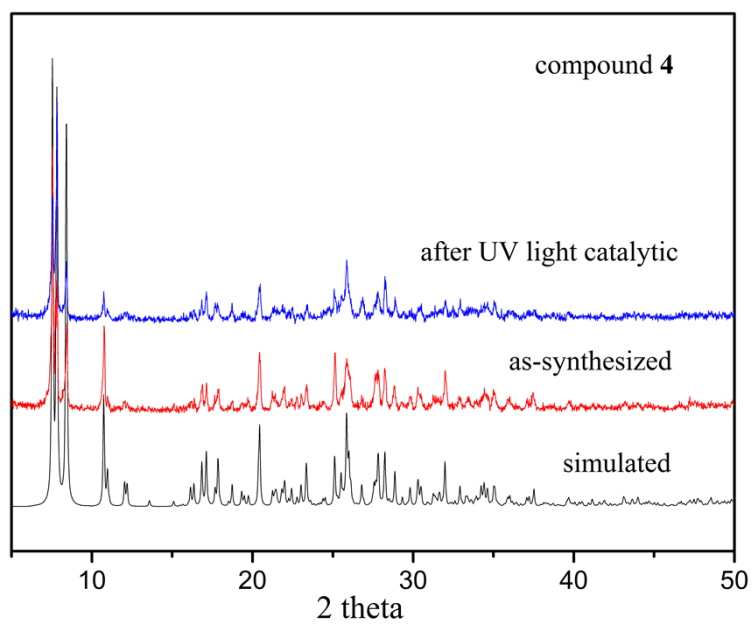

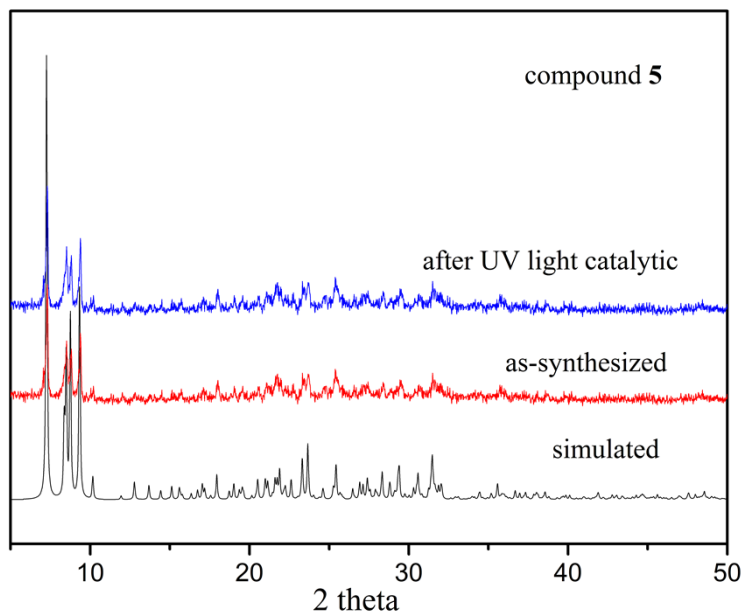

Fig. S4. The PXRD patterns of compounds 1- 5.

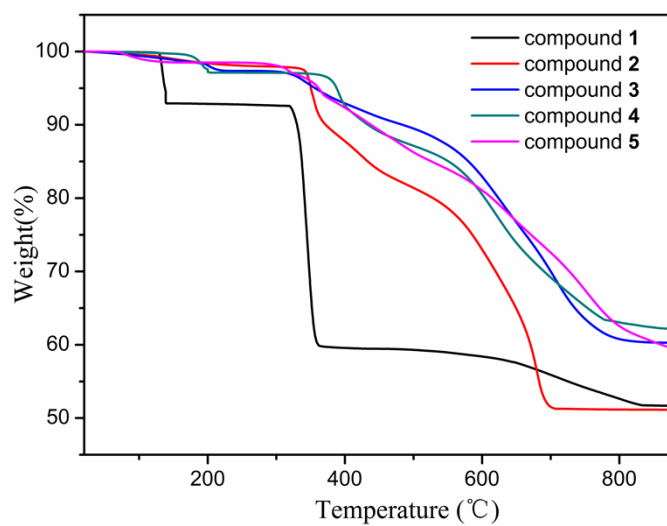

Fig. S5. The TG curves of compounds 1-5.



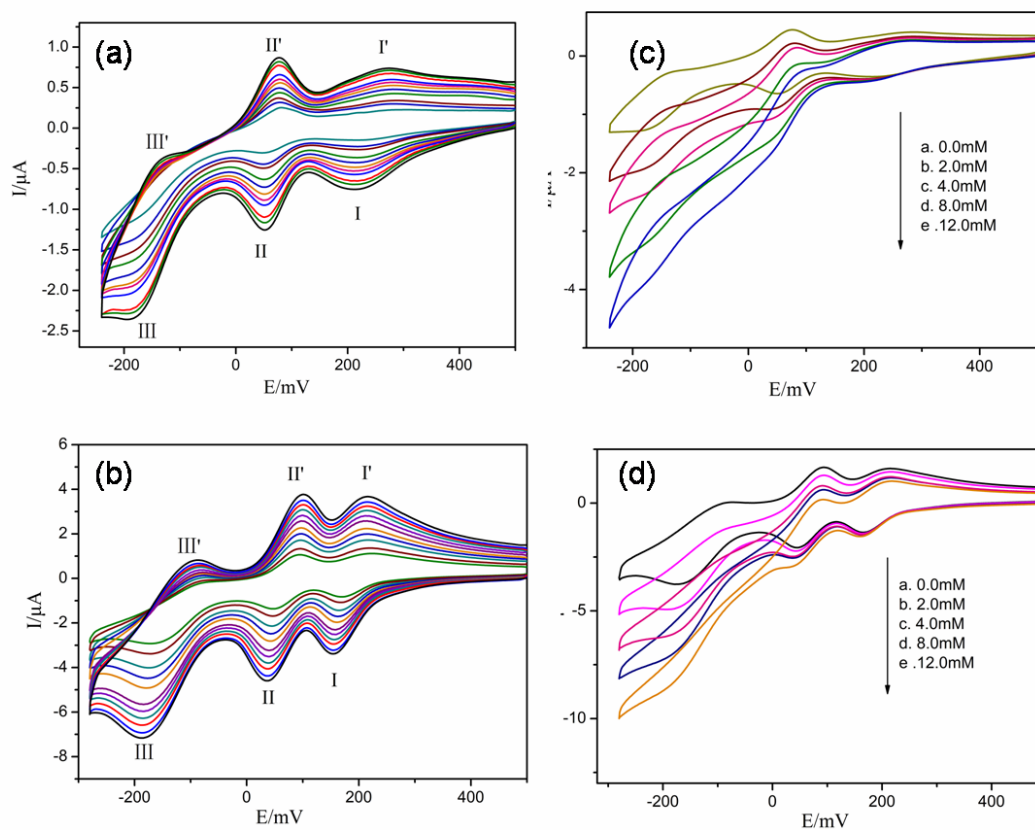

**Fig. S6.** Cyclic voltammograms of the **3**-CPE (a) and **5**-CPE (b) in 0.1 M H<sub>2</sub>SO<sub>4</sub> + 0.5 M Na<sub>2</sub>SO<sub>4</sub> aqueous solution at different scan rates (from inner to outer: 40, 80, 120, 160, 200, 250, 300, 350, 400, 450, 500 mV·s<sup>-1</sup> for **3**-CPE and 40, 120, 160, 200, 250, 300, 350, 400, 450, 500 mV·s<sup>-1</sup> for **5**-CPE). Cyclic voltammograms of **3**-CPE (c) and **5**-CPE (d) in 0.1 M H<sub>2</sub>SO<sub>4</sub> + 0.5 M Na<sub>2</sub>SO<sub>4</sub> solution containing 0.0–12.0 mM H<sub>2</sub>O<sub>2</sub>.

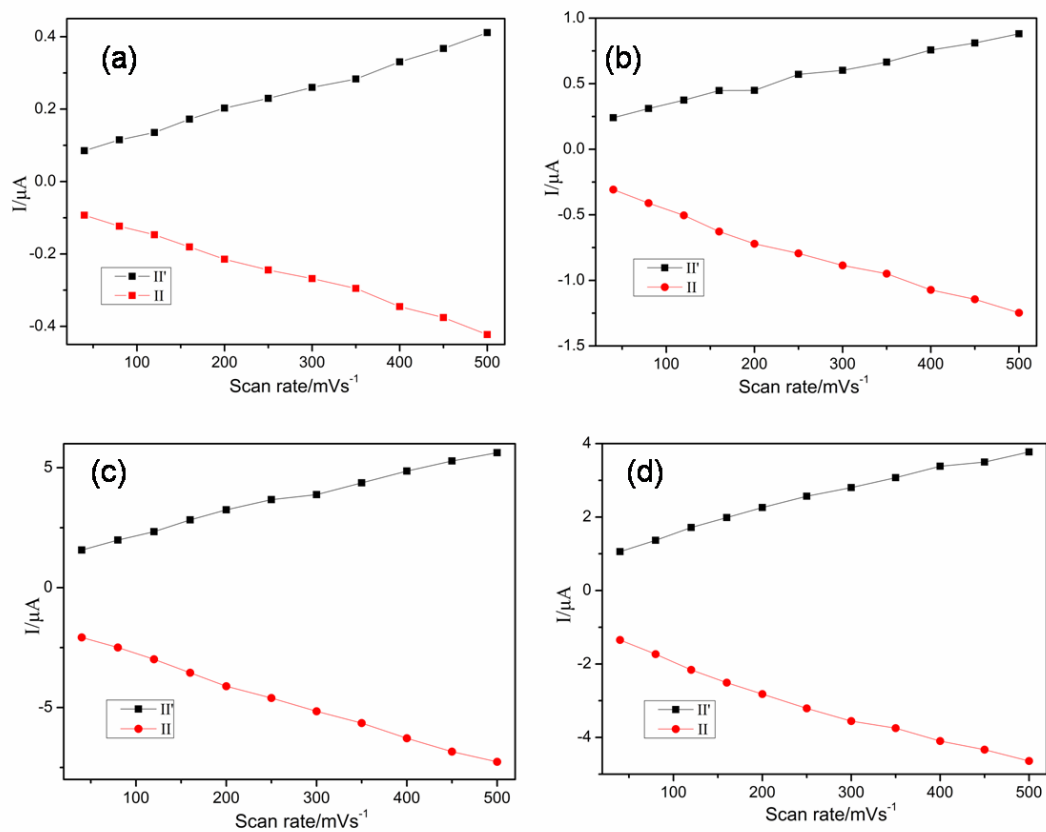

**Fig. S7.** The dependence of anodic peak (II) and cathodic peak (II') currents for 2-CPE(a), 3-CPE(b), 4-CPE(c), 5-CPE(d).

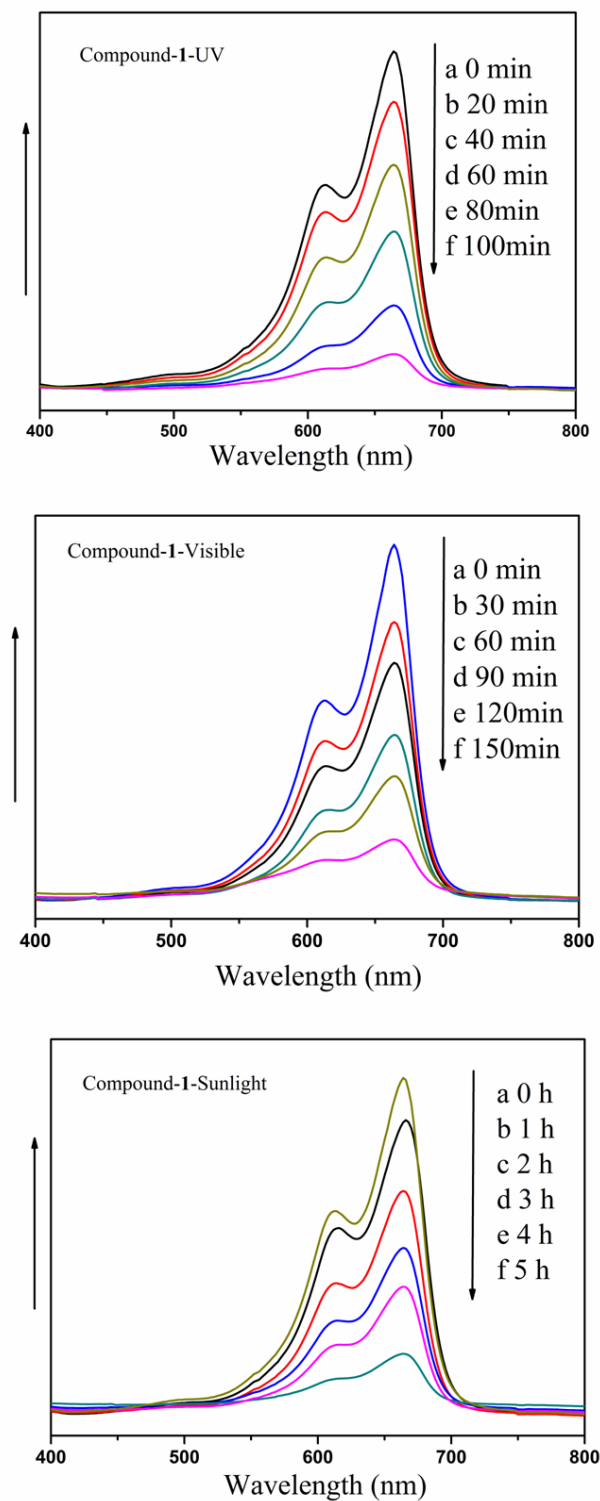

**Fig. S8.** Absorption spectra of the MB solution during the decomposition reaction under UV (a), visible (b) and sunlight (c) irradiation in the presence of the compound 1.

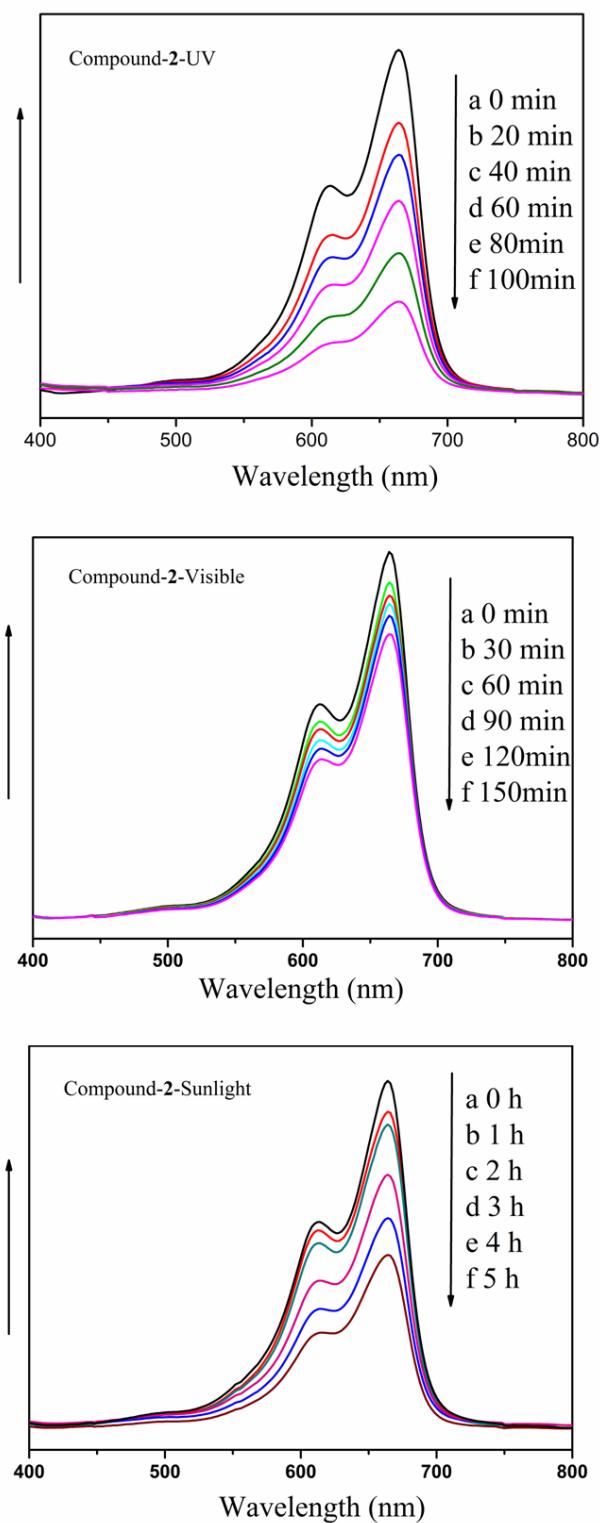

**Fig. S9.** Absorption spectra of the MB solution during the decomposition reaction under UV (a), visible (b) and sunlight (c) irradiation in the presence of the compound 2.

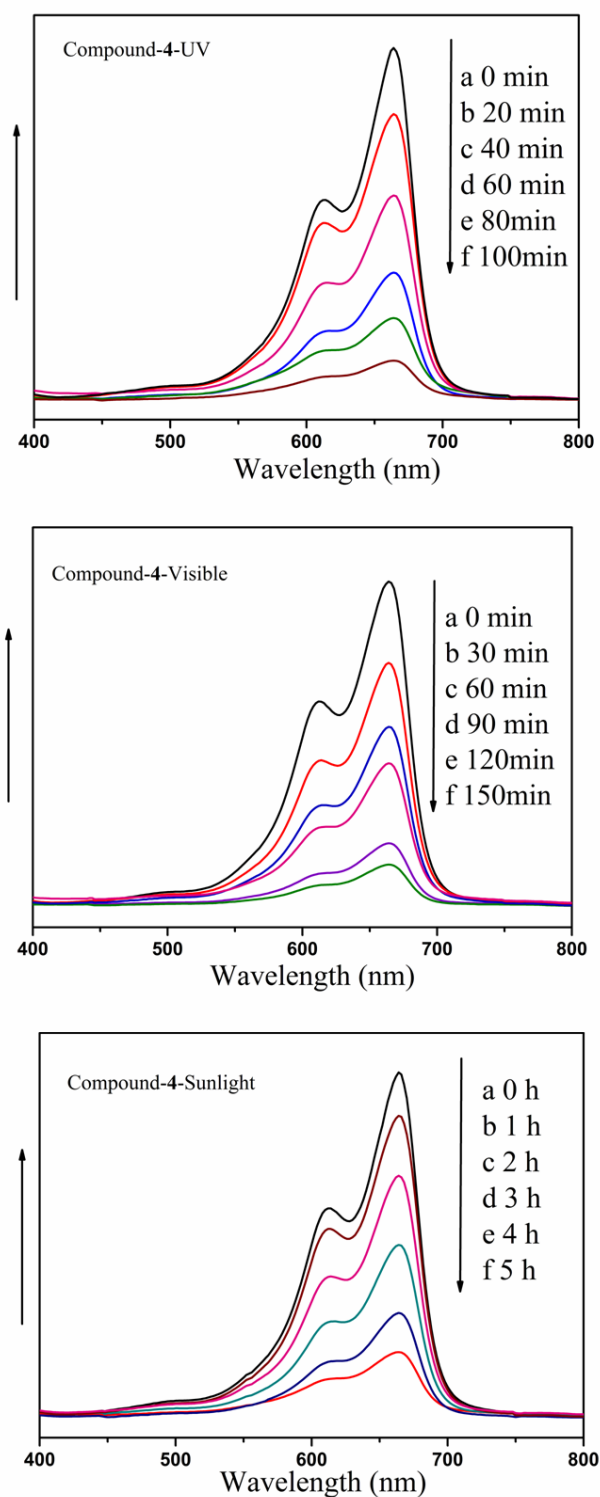

**Fig. S10.** Absorption spectra of the MB solution during the decomposition reaction under UV (a), visible (b) and sunlight (c) irradiation in the presence of the compound 4.

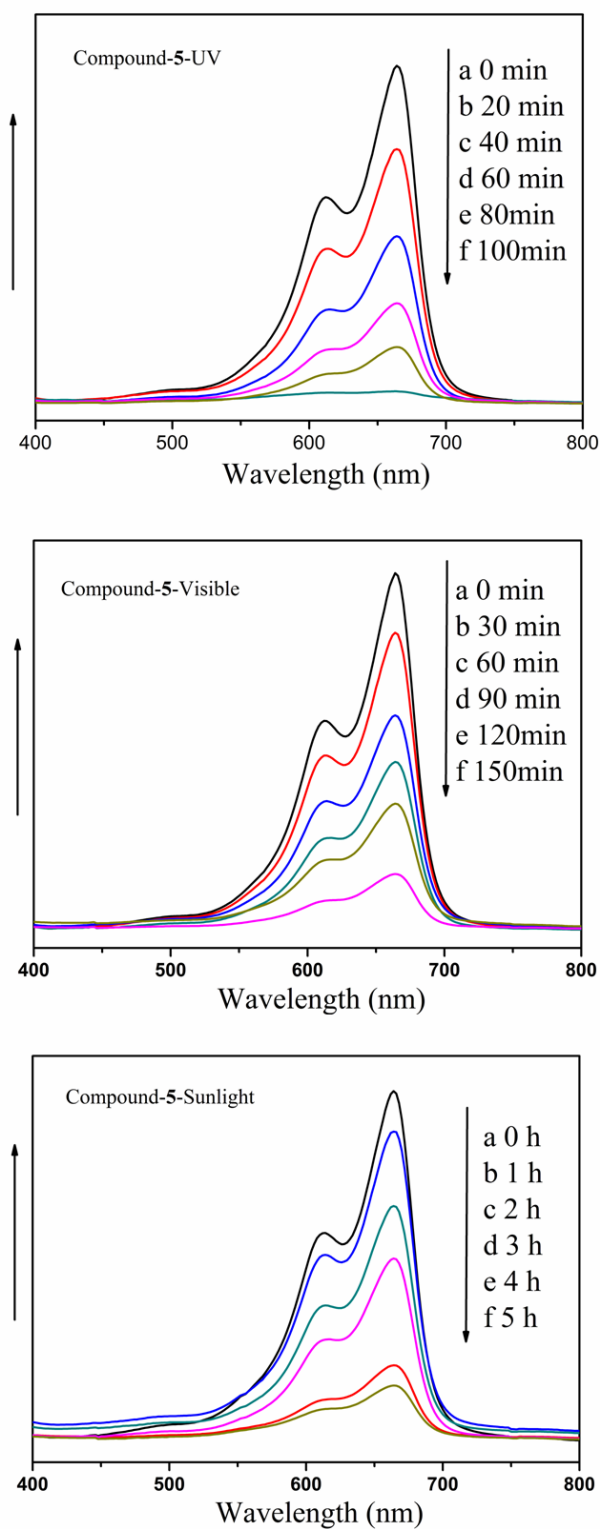

**Fig. S11.** Absorption spectra of the MB solution during the decomposition reaction under UV (a), visible (b) and sunlight (c) irradiation in the presence of the compound 5.

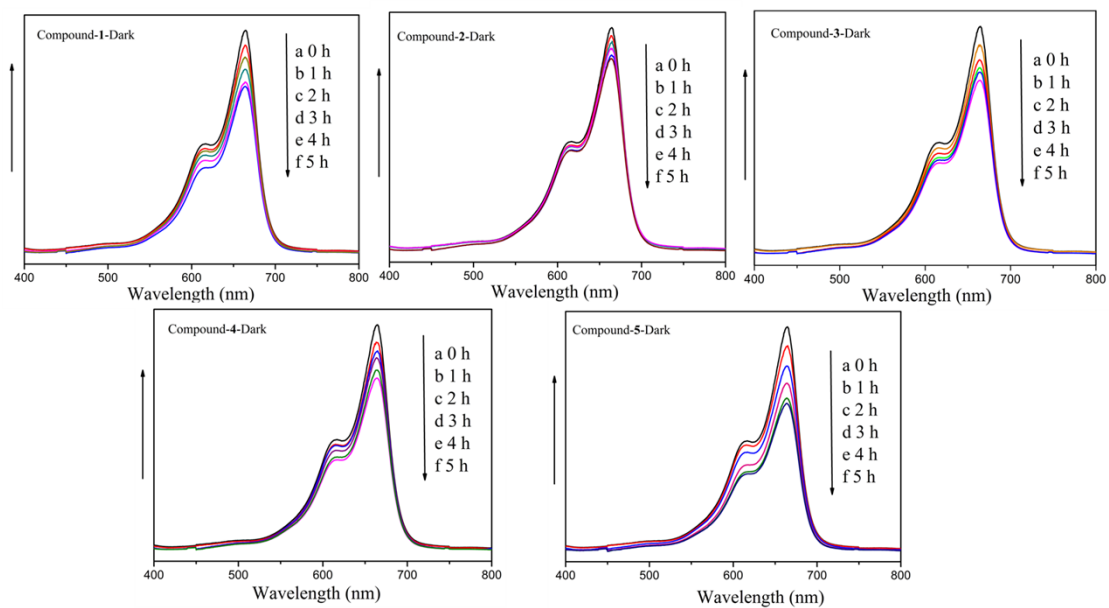

**Fig. S12.** Absorption spectra of the MB solution during the decomposition reaction in the presence of the compounds 1-5 under the dark environment.
